# Supplementary material for: Ascertainment bias from imputation methods evaluation in wheat
Source: PubMed Central journal article supplement (PMC5050639; doi:10.1186/s12864-016-3120-5), 2016-10-04

**TKW, No-imputed**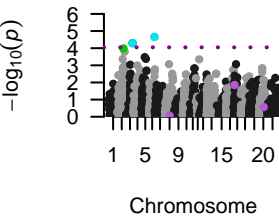**TKW, MVN-EM**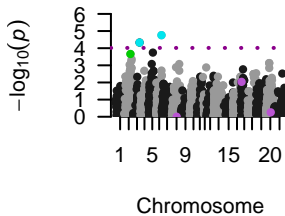**TKW, Mean**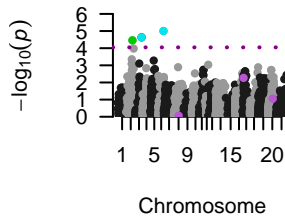**TKW, RF**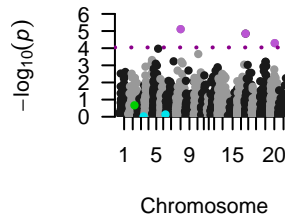**DH, No-imputed**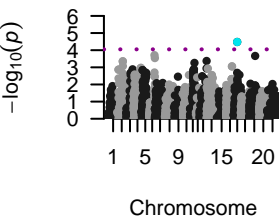**DH, MVN-EM**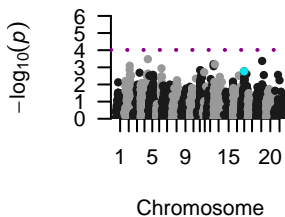**DH, Mean**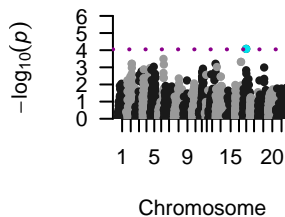**DH, RF**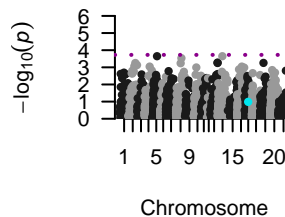**PH, No-imputed**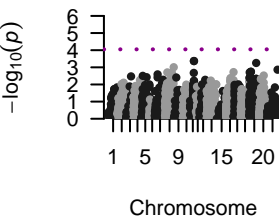**PH, MVN-EM**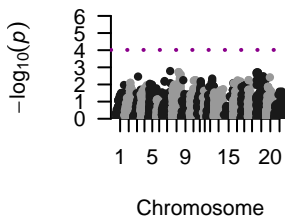**PH, Mean**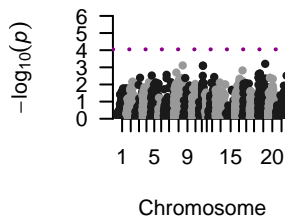**PH, RF**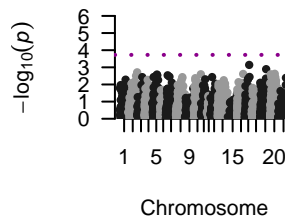**SPM, No-imputed**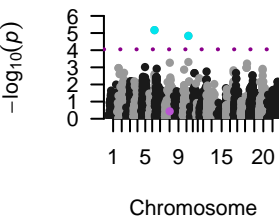**SPM, MVN-EM**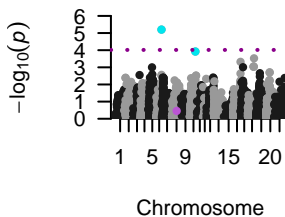**SPM, Mean**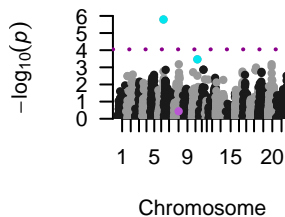**SPM, RF**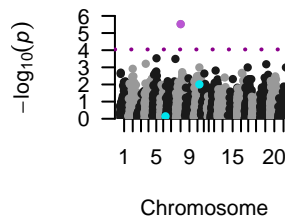

Supplement: 12864_2016_3120_MOESM11_ESM.pdf [file 12864_2016_3120_MOESM11_ESM.pdf]
