# Supplementary material for: Ascertainment bias from imputation methods evaluation in wheat
Source: PubMed Central journal article supplement (PMC5050639; doi:10.1186/s12864-016-3120-5), 2016-10-04

**TKW**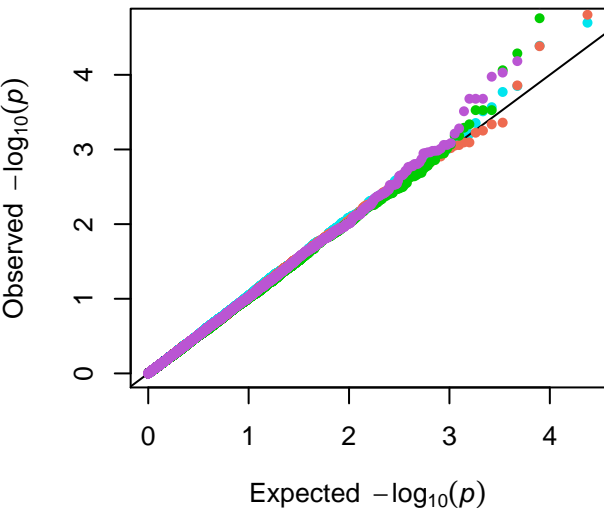**DH**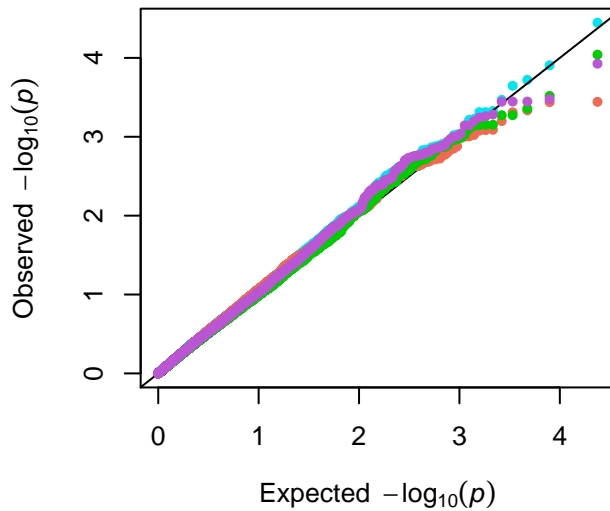**PH**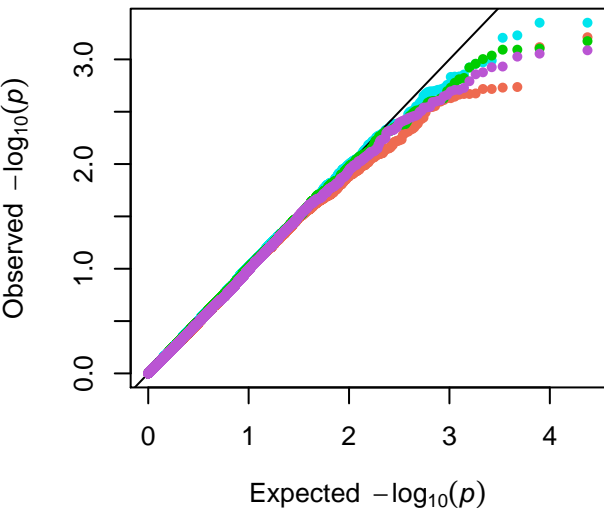**SPM**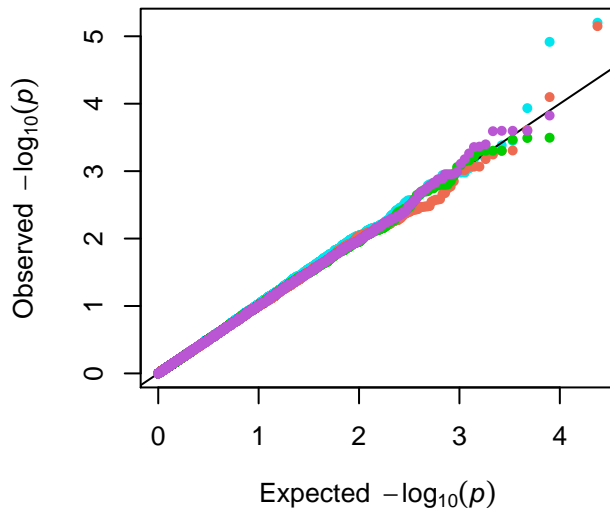

Supplement: 12864_2016_3120_MOESM10_ESM.pdf [file 12864_2016_3120_MOESM10_ESM.pdf]
